# Supplementary material for: Interaction of MdWRKY24 and MdRGL in Response to Tree Dwarfing in Malus domestica
Source: MDPI journal article supplement (doi:10.3390/agronomy12102345), 2022-09-28
Supplement: s1 [file s1]

**Table S2.** Differentially expressed transcription factors between M9 and Mr as an interstockg

| Gene_ID   | TFs       | log2FoldChange(M9vsMr) | pval(M9vsMr) |
|-----------|-----------|------------------------|--------------|
| 103431279 | LOB       | 2.07                   | 0.031868     |
| 103417614 | WRKY      | 1.9636                 | 0.043619     |
| 103415023 | MADS      | 1.86                   | 0.0088148    |
| 103405832 | MYB       | 1.8448                 | 0.00456      |
| 103431001 | bZIP      | 1.5618                 | 0.032306     |
| 103410633 | bHLH      | 1.5029                 | 0.041812     |
| 103448978 | OFP       | 1.1942                 | 0.022201     |
| 103446280 | MADS      | 1.1687                 | 0.0094762    |
| 103423117 | CCAAT     | -1.0695                | 0.012853     |
| 103402726 | AP2-EREBP | -1.0791                | 0.019713     |
| 103447775 | Orphans   | -1.1463                | 0.0087652    |
| 103439589 | AP2-EREBP | -1.1834                | 8.95E-05     |
| 103445801 | Orphans   | -1.5315                | 0.0042716    |
