# Supplementary material for: Interaction of MdWRKY24 and MdRGL in Response to Tree Dwarfing in Malus domestica
Source: MDPI journal article supplement (doi:10.3390/agronomy12102345), 2022-09-28
Supplement: s1 [file s1]

**Table S1.** Sequences of primers

| Primer      | Sequences (5'-3')               | Function           | Gene ID   |
|-------------|---------------------------------|--------------------|-----------|
| MdWRKY24-qF | ACCTCCCAATCGCTGCCCTTGTCAT       | For<br>qRT-PC<br>R | 103417614 |
| MdWRKY24-qR | CCTGCCGCTTGAGTACCACCAGAGA       |                    |           |
| MdWRKY50-qF | CGACTTTTCCAACAACCTCGAAT         |                    | 103420177 |
| MdWRKY50-qR | CCAGAGTCATCAGCTTCATTG           |                    |           |
| MdWRKY40-qF | TTTATGTTACACCGATGCATC           |                    | 103421017 |
| MdWRKY40-qR | ACTTGTAGTAAGCCCTAGGAGA          |                    |           |
| MdWRKY14-qF | CCTACTCAGAGAAATGCCCTAG          |                    | 103431032 |
| MdWRKY14-qR | CCTACTCAGAGAAATGCCCTAG          |                    |           |
| MdWRKY35-qF | CTTGTAGCCACAATCATTCAGG          |                    | 103432616 |
| MdWRKY35-qR | AAAATCTGATTGGGGACTCGAT          |                    |           |
| MdWRKY33-qF | GGCCTGCAACTAATCTTCAATC          |                    | 103433719 |
| MdWRKY33-qR | CGACCATATTGCGAAGATTGAG          |                    |           |
| MdWRKY49-qF | GAGCTTCTGGACAATGATTCAC          |                    | 103433503 |
| MdWRKY49-qR | CCGAATAGACGTTAGGGATGAA          |                    |           |
| MdWRKY70-qF | AGAAGAAAGAAGCTCACAAGGA          |                    | 103433764 |
| MdWRKY70-qR | GTTTGAAGAAGCACTTGATGGT          |                    |           |
| MdWRKY7-qF  | GCGAACTCGTTCATTTCTTCTT          |                    | 103455944 |
| MdWRKY7-qR  | GTTTCCTTGTCTTCGAACAGTG          |                    |           |
| MdWRKY13-qF | ATGTGCTTGATGATGGTTAC            |                    | 103454203 |
| MdWRKY13-qR | CGGCTAATCGCTCTACTC              |                    |           |
| β-Actin -qF | GGATTTGCTGGTGATGATGCT           |                    |           |
| β-Actin -qR | AGTTGCTCACTATGCCGTGCT           |                    |           |
| MdWRKY24-MF | AAccATGGAAGATCATCATCAACAGCATAAT | gene               |           |
| MdWRKY24-MR | TTGGTCACCTTAGAACCTAGAGAGGAATTG  | cloning            |           |
| M13-F       | CATTTG                          | primer             |           |
|             | AGGGTTTTCCCAGTCACG              | Verify             |           |
| M13-R       | GAGCGGATAACAATTTACAC            | vector             |           |
|             |                                 | construc           |           |
|             |                                 | tion               |           |
| MdWRKY24-F1 | ACGAGCTCGGTACCATGGAAGATCATCATC  | Constru            |           |
|             | AACAGCA                         | ction of           |           |
|             |                                 | expressi           |           |
| MdWRKY24-R1 | CATGGTGTGCGACTCTAGAGAACCTAGAGAG | on                 |           |
|             | GAATTGCATTG                     | vector             |           |
