# Supplementary material for: Interaction of MdWRKY24 and MdRGL in Response to Tree Dwarfing in Malus domestica
Source: MDPI journal article supplement (doi:10.3390/agronomy12102345), 2022-09-28
Supplement: s1 [file s1]

**Table S4.** Transcription factors differentially expressed between SH40 and M9 as interstock

| Gene_ID   | TFs       | log <sub>2</sub> FoldChange(SH40vsM9) | pval(SH40vsM9) |
|-----------|-----------|---------------------------------------|----------------|
| 103439707 | AP2-EREBP | 3.0742                                | 0.0075448      |
| 103437432 | bHLH      | 2.7777                                | 0.028819       |
| 103438006 | MYB       | 2.4408                                | 0.005268       |
| 103451803 | NAC       | 2.0356                                | 0.011637       |
| 103431221 | MYB       | 1.9491                                | 0.030214       |
| 103437639 | TAZ       | 1.8418                                | 0.049961       |
| 103421318 | bHLH      | 1.6745                                | 0.010753       |
| 103439922 | HB        | 1.6619                                | 0.044935       |
| 103444676 | AP2-EREBP | 1.6115                                | 0.020963       |
| 103452857 | AP2-EREBP | 1.5315                                | 0.039999       |
| 103439936 | GRF       | 1.4878                                | 0.0026897      |
| 103400844 | CCAAT     | 1.4832                                | 0.019223       |
| 103437916 | MADS      | 1.4316                                | 0.031692       |
| 103402726 | AP2-EREBP | 1.3989                                | 0.026785       |
| 103405327 | bHLH      | 1.364                                 | 0.018396       |
| 103447277 | OFP       | 1.2946                                | 0.018648       |
| 103433719 | WRKY      | 1.1703                                | 0.012115       |
| 103447297 | WRKY      | 1.1563                                | 0.018227       |
| 103402970 | Orphans   | 1.1194                                | 0.0027733      |
| 103437756 | Orphans   | 1.0154                                | 0.010358       |
| 103440982 | C2H2      | -1.104                                | 0.012875       |
| 103410100 | AP2-EREBP | -1.1063                               | 0.0096485      |
| 103416019 | C2H2      | -1.1164                               | 0.011701       |
| 103424213 | NAC       | -1.1424                               | 0.0057492      |
| 103418050 | NAC       | -1.2798                               | 0.01163        |
| 103434363 | C2H2      | -1.3341                               | 0.029386       |
| 103446280 | MADS      | -1.3614                               | 0.011382       |

---

|           |           |         |            |
|-----------|-----------|---------|------------|
| 103431187 | zf-HD     | -1.3675 | 0.0050574  |
| 103437687 | LOB       | -1.3688 | 0.029888   |
| 103438747 | AP2-EREBP | -1.3817 | 0.0027938  |
| 103441613 | bZIP      | -1.447  | 0.011567   |
| 103454173 | CCAAT     | -1.4512 | 0.0054146  |
| 103436876 | NAC       | -1.526  | 0.014821   |
| 103409652 | MADS      | -1.5691 | 0.031316   |
| 103442371 | NAC       | -1.7691 | 0.0001857  |
| 103434807 | C2H2      | -2.0063 | 0.011888   |
| 103453345 | bZIP      | -2.0399 | 0.034949   |
| 103426713 | MADS      | -2.063  | 0.025138   |
| 103431279 | LOB       | -2.2207 | 0.035422   |
| 103455907 | LOB       | -2.2782 | 0.003438   |
| 103448978 | OFP       | -2.4858 | 0.00031279 |
| 103445818 | MYB       | -2.495  | 0.0096037  |
| 103440404 | MYB       | -2.5091 | 0.0050681  |
| 103446319 | C2C2-Dof  | -2.6375 | 0.0077707  |
| 103408672 | MYB       | -2.7174 | 0.032145   |
| 103410982 | MADS      | -2.7201 | 0.0046396  |
| 103455500 | NAC       | -2.8303 | 0.02934    |
| 103453136 | OFP       | -3.0916 | 0.0010767  |
| 103445975 | MYB       | -3.2588 | 9.42E-05   |
| 103446584 | MYB       | -3.3088 | 0.042035   |
| 103431001 | bZIP      | -3.4945 | 0.00049087 |
| 103432036 | MYB       | -3.8977 | 0.016809   |
| 103401642 | MYB       | -3.9696 | 0.0012802  |

---

---

|           |      |         |            |
|-----------|------|---------|------------|
| 103439033 | C2H2 | -4.3438 | 0.0071774  |
| 103435512 | MYB  | -4.5363 | 0.015829   |
| 103415227 | bZIP | -5.259  | 0.017003   |
| 103417614 | WRKY | -5.7791 | 0.00012656 |

---
