# Supplementary material for: Interaction of MdWRKY24 and MdRGL in Response to Tree Dwarfing in Malus domestica
Source: MDPI journal article supplement (doi:10.3390/agronomy12102345), 2022-09-28
Supplement: s1 [file s1]

**Table S6.** WRKY transcription factors were not expressed in all three rootstock panicle combinations.

| Gene ID   | Fuji/SH40/Mr_RPKM | Fuji/M9/Mr_RPKM | Fuji/Mr/Mr_RPKM | Gene_description                         |
|-----------|-------------------|-----------------|-----------------|------------------------------------------|
| 103402322 | 0.03              | 0.00            | 0.00            | probable WRKY<br>transcription factor 9  |
| 103402297 | 0.00              | 0.04            | 0.04            | probable WRKY<br>transcription factor 19 |
| 103407769 | 0.00              | 0.91            | 0.41            | probable WRKY<br>transcription factor 43 |
| 103413747 | 0.00              | 0.11            | 0.02            | WRKY transcription<br>factor 44-like     |
| 103404419 | 0.00              | 0.05            | 0.00            | probable WRKY<br>transcription factor 72 |
| 103409645 | 0.00              | 0.04            | 0.00            | probable WRKY<br>transcription factor 75 |
| 103411361 | 0.00              | 0.03            | 0.00            | probable WRKY<br>transcription factor 72 |
| 103417401 | 0.00              | 0.04            | 0.00            | probable WRKY<br>transcription factor 19 |
| 103448476 | 0.00              | 0.02            | 0.00            | probable WRKY<br>transcription factor 31 |
| 103411844 | 0.02              | 0.00            | 0.02            | probable WRKY<br>transcription factor 23 |
| 103423637 | 0.02              | 0.00            | 0.01            | probable WRKY<br>transcription factor 54 |
| 103425538 | 0.14              | 0.00            | 0.03            | probable WRKY<br>transcription factor 75 |
| 103426879 | 0.02              | 0.00            | 0.02            | probable WRKY                            |

---

|           |      |      |      |                         |
|-----------|------|------|------|-------------------------|
|           |      |      |      | transcription factor 19 |
| 103417878 | 0.00 | 0.00 | 0.12 | probable WRKY           |
|           |      |      |      | transcription factor 53 |
| 103425943 | 0.00 | 0.00 | 0.01 | probable WRKY           |
|           |      |      |      | transcription factor 31 |
| 103439393 | 0.00 | 0.00 | 0.04 | probable WRKY           |
|           |      |      |      | transcription factor 53 |
| 103443683 | 0.00 | 0.00 | 0.01 | probable WRKY           |
|           |      |      |      | transcription factor 19 |
| 103450758 | 0.00 | 0.00 | 0.04 | probable WRKY           |
|           |      |      |      | transcription factor 70 |
| 103451854 | 0.00 | 0.00 | 0.03 | probable WRKY           |
|           |      |      |      | transcription factor 61 |

---
