# Supplementary material for: Interaction of MdWRKY24 and MdRGL in Response to Tree Dwarfing in Malus domestica
Source: MDPI journal article supplement (doi:10.3390/agronomy12102345), 2022-09-28
Supplement: s1 [file s1]

**Table S3.** Transcription factors differentially expressed between SH40 and Mr as interstock

| Gene_ID   | TFs       | log2FoldChange(SH40vsMr) | pval(SH40vsMr) |
|-----------|-----------|--------------------------|----------------|
| 103421318 | bHLH      | 2.0427                   | 0.005734       |
| 103452920 | HB        | 1.8974                   | 0.048065       |
| 103444676 | AP2-EREBP | 1.6107                   | 0.027082       |
| 103450846 | ARID      | 1.4452                   | 0.031741       |
| 103439936 | GRF       | 1.3399                   | 0.0058985      |
| 103400844 | CCAAT     | 1.3181                   | 0.022187       |
| 103419295 | NAC       | 1.2946                   | 0.0050284      |
| 103450193 | MYB       | 1.2522                   | 0.038196       |
| 103429929 | MYB       | 1.0914                   | 0.022403       |
| 103430331 | NAC       | -1.0022                  | 0.020721       |
| 103436876 | NAC       | -1.0165                  | 0.01126        |
| 103433071 | MYB       | -1.0469                  | 0.033002       |
| 103416019 | C2H2      | -1.0664                  | 0.024767       |
| 103423117 | CCAAT     | -1.1624                  | 0.009019       |
| 103436434 | MYB       | -1.1717                  | 0.0017245      |
| 103450804 | MYB       | -1.1744                  | 0.0089921      |
| 103408672 | MYB       | -1.2014                  | 0.041573       |
| 103418556 | Trihelix  | -1.2572                  | 0.0028109      |
| 103423540 | MYB       | -1.3027                  | 0.013659       |
| 103440982 | C2H2      | -1.3071                  | 0.0014384      |
| 103437687 | LOB       | -1.3297                  | 0.015334       |
| 103431187 | zf-HD     | -1.3543                  | 0.024901       |
| 103455500 | NAC       | -1.4932                  | 0.010159       |
| 103438277 | MYB       | -1.4978                  | 0.0054707      |
| 103453345 | bZIP      | -1.5668                  | 0.046668       |
| 103455673 | MYB       | -1.5725                  | 0.0051304      |
| 103448485 | MYB       | -1.5868                  | 0.04896        |

---

|           |          |         |            |
|-----------|----------|---------|------------|
| 103445121 | Orphans  | -1.6009 | 0.0041174  |
| 103400048 | PLATZ    | -1.6238 | 0.043451   |
| 103446584 | MYB      | -1.6559 | 0.0027507  |
| 103409652 | MADS     | -1.751  | 0.019333   |
| 103455907 | LOB      | -1.8588 | 0.033003   |
| 103453136 | OFP      | -2.0309 | 0.0013773  |
| 103432036 | MYB      | -2.0461 | 5.61E-05   |
| 103424381 | MYB      | -2.1272 | 0.04592    |
| 103410982 | MADS     | -2.1986 | 0.00028127 |
| 103446319 | C2C2-Dof | -2.3753 | 0.0011509  |
| 103401642 | MYB      | -2.4463 | 0.00084426 |
| 103445975 | MYB      | -2.6418 | 0.00066257 |
| 103440404 | MYB      | -2.819  | 1.75E-05   |
| 103426983 | WRKY     | -3.2297 | 0.0086555  |
| 103417614 | WRKY     | -3.8145 | 0.025025   |
| 103435512 | MYB      | -3.9566 | 0.0237     |
| 103439684 | bHLH     | -4.0009 | 0.030817   |
| 103439033 | C2H2     | -4.3848 | 0.00015209 |

---
